# Supplementary material for: A single class II myosin modulates T cell motility and stopping, but not synapse formation
Source: Springer Nature journal article supplement (doi:10.1038/ni1065), 2004-04-04
Supplement: 41590_2004_BFni1065_MOESM1_ESM.pdf [file 41590_2004_BFni1065_MOESM1_ESM.pdf]

**Pre-contact**

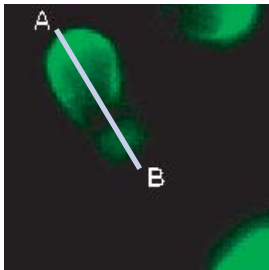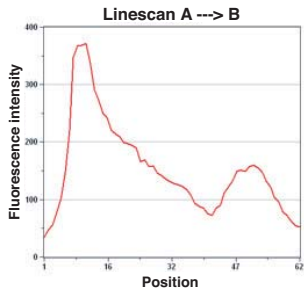

**Post-contact**

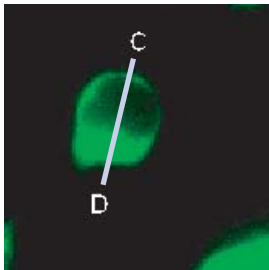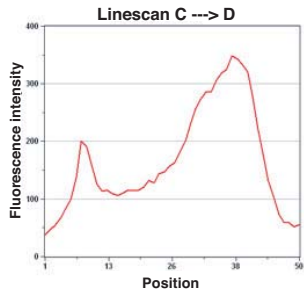

**Supplementary Figure 1** MyH9 redistribution to the synapse. Pre- and post- T cell-APC contact images of MyH9-GFP fluorescence from Figure 2c are shown to the left. Green fluorescence intensity values, along a line that spans from the back to the front of the T cell, are plotted on the right showing a bulk MyH9 redistribution from back to front upon synapse formation.
