# Supplementary material for: A single class II myosin modulates T cell motility and stopping, but not synapse formation
Source: Springer Nature journal article supplement (doi:10.1038/ni1065), 2004-04-04
Supplement: 41590_2004_BFni1065_MOESM2_ESM.pdf [file 41590_2004_BFni1065_MOESM2_ESM.pdf]

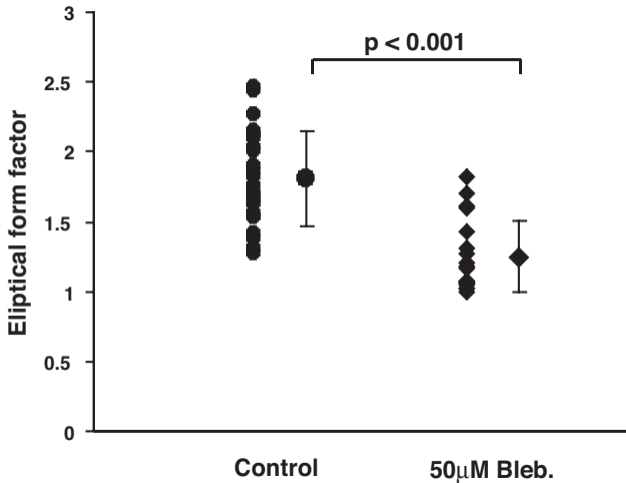

**Supplementary Figure 2** MyH9 motor activity is required for T cell polarity. The degree of roundness of cells was assessed by measuring the elliptical form factor (see Methods) of 20 individual cells per treatment group. Values of 1 equal to a round cell.
