# Supplementary material for: A single class II myosin modulates T cell motility and stopping, but not synapse formation
Source: Springer Nature journal article supplement (doi:10.1038/ni1065), 2004-04-04
Supplement: 41590_2004_BFni1065_MOESM3_ESM.pdf [file 41590_2004_BFni1065_MOESM3_ESM.pdf]

# Control

# Blebbistatin

DIC

Fluorescence

DIC

Fluorescence

CD3

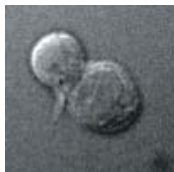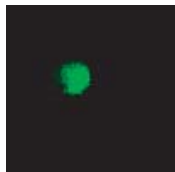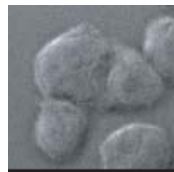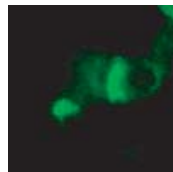

LFA-1

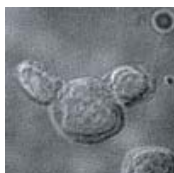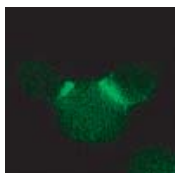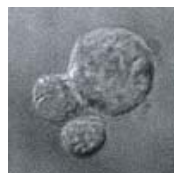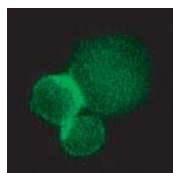

MyH9

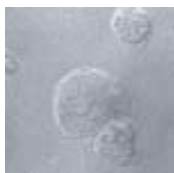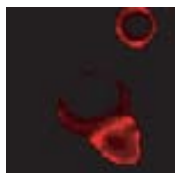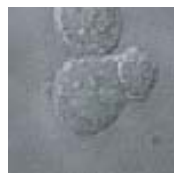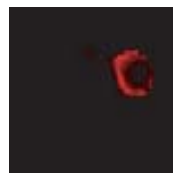

Actin

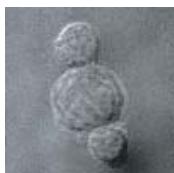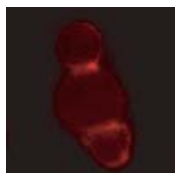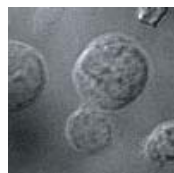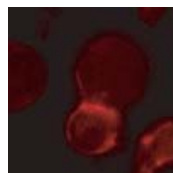

Tubulin

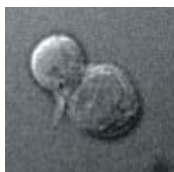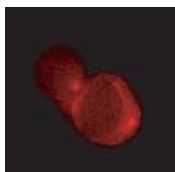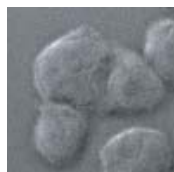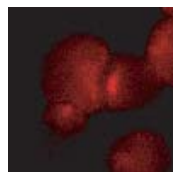

**Supplementary Figure 3** MyH9 inhibition does not prevent synapse localization of TCR-CD3, LFA-1, MyH9, actin or MTOC. DIC and fluorescent images of T cell-APC couples for each staining are shown. Couples shown are representative of the results obtained in three independent experiments.
